11 **Abstract**

12 A key goal of pertussis control is to protect infants too young to be vaccinated, the age  
13 group most vulnerable to this highly contagious respiratory infection. In the last decade,  
14 maternal immunization has been deployed in many countries, successfully reducing  
15 pertussis in this age group. Because of immunological blunting, however, this strategy  
16 may erode the effectiveness of primary vaccination at later ages. Here, we systematically  
17 reviewed the literature on the relative risk (RR) of pertussis after primary immunization  
18 of infants born to vaccinated vs. unvaccinated mothers. The four studies identified had  
19  $\leq 6$  years of follow-up and large statistical uncertainty (meta-analysis weighted mean RR:  
20 0.71, 95% CI: 0.38–1.32). To interpret this evidence, we designed a new mathematical  
21 model with explicit blunting mechanisms and evaluated maternal immunization's short-  
22 and long-term impact on pertussis transmission dynamics. We show that transient  
23 dynamics can mask blunting for at least a decade after rolling out maternal immunization.  
24 Hence, the current epidemiological evidence may be insufficient to rule out modest  
25 reductions in the effectiveness of primary vaccination. Irrespective of this potential  
26 collateral cost, we predict that maternal immunization will remain effective at protecting  
27 unvaccinated newborns, supporting current public health recommendations.

28

## 29 Introduction

30

31 Pertussis is a highly transmissible respiratory infection that is primarily caused by the  
32 bacterium *Bordetella pertussis*<sup>1,2</sup>. Pertussis was a leading cause of childhood mortality  
33 until intense immunization programs, from the 1940s onwards, reduced pertussis  
34 notifications by over 90% in many countries<sup>3,4</sup>. However, in the last couple of decades,  
35 pertussis has re-emerged in many populations with high long-term immunization  
36 coverage, for reasons which remain highly debated<sup>5</sup>.

37

38 Newborns are the age group most vulnerable to pertussis. In high-income countries,  
39 pertussis-related hospitalization rates in infants under 6 months are between 100 and  
40 100,000 per year<sup>6</sup>, and data from the US<sup>7</sup> and Australia<sup>8</sup> show that over 60% of pertussis-  
41 associated hospitalizations are under one year old. To reduce the burden of pertussis in  
42 vulnerable newborns, since 2012, many countries have introduced maternal  
43 immunization—*i.e.*, vaccinating pregnant individuals, usually during the second or third  
44 trimester of pregnancy, with a low-dose tetanus toxoid, diphtheria toxoid, and acellular  
45 pertussis (Tdap) vaccine. In 2015, the World Health Organization (WHO) issued an  
46 official recommendation for maternal immunization with acellular vaccines against  
47 pertussis (based on studies with acellular primary immunization)<sup>9</sup>, and by 2020 maternal  
48 immunization against pertussis was recommended in 55 countries<sup>10</sup>.

49

50 Maternal immunization is highly effective at protecting newborns, with estimates of  
51 reductions in the risk of pertussis infection ranging from 70 to 95%<sup>8,11-17</sup>. However, the  
52 downstream consequences of maternal immunization, when infants receive their routine  
53 pertussis vaccines, are poorly understood. Specifically, there has been long-standing  
54 concern regarding potential immunological blunting, *i.e.*, the interference of maternally  
55 transferred antibodies with the infant immune response<sup>18-20</sup>. Indeed, several studies and  
56 meta-analyses have shown that, after infants received their primary immunization, the  
57 antibody concentrations against several pertussis antigens were reduced by 30% to 60%  
58 in infants from vaccinated mothers relative to infants from unvaccinated mothers<sup>21-24</sup>.  
59 Similarly, the avidity of pertussis antibodies is reduced in infants from vaccinated  
60 mothers<sup>25</sup>. Interestingly, the blunting response following maternal pertussis  
61 immunization appears to be heterologous, also causing decreased antibody

62 concentration after infants received a polio vaccine<sup>26</sup> and the blunting response also  
63 applies to other vaccines that contain (modified) diphtheria or tetanus toxins as carrier  
64 proteins, such as pneumococcus conjugate vaccines <sup>22,26</sup>.

65

66 While immunological blunting is well documented, because the first maternal  
67 immunization programs were implemented in 2012, the long-term consequences of  
68 blunting on vaccine effectiveness (VE) and the ensuing epidemiology of pertussis remain  
69 difficult to evaluate. Here, we assess the epidemiological evidence for blunting and  
70 estimate the long-term consequences of maternal immunization in three steps. First, we  
71 perform a systematic review of the literature for estimates of the impact of maternal  
72 immunization on the relative risk of pertussis after primary pertussis immunization in  
73 infants from vaccinated mothers relative to unvaccinated mothers. Second, we extend a  
74 previously validated model of pertussis immunization<sup>4,27</sup> to simulate over several  
75 decades the short- and long-term epidemiological impact of maternal immunization with  
76 various levels of blunting and maternal immunization coverages on the age-specific time  
77 series of pertussis incidence. Third, to identify possible levels of blunting and the  
78 consequences of maternal immunization, we match the relative risk estimates obtained  
79 from the systematic review with those obtained from the modeling study.

80

## 81 **Results**

82

83 *A systematic review of empirical studies on the relative risk of pertussis after maternal and*  
84 *infant primary immunization*

85

86 We identified 374 peer-reviewed articles and, after removing 146 duplicate records, we  
87 screened 228 abstracts for a mention of maternal immunization with either a number of  
88 cases, an odds ratio or a relative risk of pertussis and/or effectiveness of a pertussis  
89 vaccine (Fig. 1). Based on these criteria, we identified and retrieved 69 articles that might  
90 contain information (Table S4).

91

92 Our search identified four studies that reported five estimates of the relative risk of  
93 pertussis in infants from vaccinated versus unvaccinated mothers and that specified the  
94 dose of infant primary immunization (Fig. 1, Fig. 2, Table S1). Two studies were carried

95 out in the UK, one in Australia, and one in California, US. In all studies, maternal  
96 immunization coverage was low right after the implementation of maternal  
97 immunization but increased to reach >70% (Table S1). The studies' follow-up times  
98 ranged from 2 to 6 years (Table S1). At the first dose of infant primary immunization,  
99 these studies showed a weighted mean RR of 0.26 (Fig. 2, 95% CI: 0.11–0.67). At the  
100 second dose of infant primary immunization, the RR increased to a weighted mean of 0.73  
101 (Fig. 2, 95% CI: 0.39–1.34) and this was very similar to the weighted mean RR at the third  
102 dose of infant primary immunization which had a value of 0.71 (Fig. 2, 95% CI: 0.38–  
103 1.32).

104

105 *The model recapitulates the historical trends of pertussis, with a resurgence caused by a*  
106 *honeymoon effect*

107

108 To interpret the RR estimates and assess the short- and long-term impact of blunting on  
109 pertussis transmission dynamics, we extended an empirically validated model of  
110 pertussis epidemiology<sup>4,27</sup>, to incorporate maternal immunization and its dual effects of  
111 protecting unvaccinated newborns and blunting vaccine effectiveness after infant  
112 primary immunization. To assess the historical impact of routine immunization in infants,  
113 we first examined the trends in overall incidence and age-specific susceptibility. Infant  
114 immunization induced a strong decrease in pertussis incidence but was followed by a  
115 rebound with a gradual buildup of susceptible individuals in adult age groups until a new  
116 equilibrium—with lower incidence than in the pre-vaccine era—was reached several  
117 decades later (Fig. 3 A & B). As previously demonstrated in the US, this resurgence was  
118 explained as an “end-of-honeymoon” effect, a predictable consequence of incomplete  
119 immunization with imperfect but highly effective vaccines. Hence, our model  
120 recapitulated the historical dynamics of pertussis in the US, characterized by a  
121 resurgence and shift of infections to adolescent and adult age groups<sup>4</sup>.

122

123 *Transient dynamics after the start of maternal immunization*

124

125 Second, we examined the impact of maternal immunization, which we introduced 100  
126 years after the rollout of infant immunization, to disentangle the consequences of the two  
127 immunization programs. Maternal immunization had the intended effect of decreasing

128 susceptibility to infection in unvaccinated newborns aged 0–2 months (Fig. 3B).  
129 However, after the rollout of maternal immunization, the model predicted a transient  
130 phase with lower pertussis incidence, lasting at least 5 years and followed by a rebound  
131 (Fig. 4A). In newborns, pertussis incidence was lower after the start of maternal  
132 immunization relative to before, but the benefit of maternal immunization was larger in  
133 a scenario without blunting than in a scenario with blunting (Fig. 4A). Thus, maternal  
134 immunization was predicted to be effective at protecting unvaccinated newborns, with  
135 benefits by far outweighing any possible blunting-mediated increases in incidence.

136  
137 By contrast, in the second age class of infants aged 3–18 months, (*i.e.*, after receipt of the  
138 primary pertussis immunization), maternal immunization was followed by a decrease of  
139 pertussis incidence, but only when blunting was low (<10%, Fig. 4B). At higher levels of  
140 blunting, pertussis incidence was predicted to increase relative to before the start of  
141 maternal immunization (Fig. 4B). Irrespective of the simulated blunting level, the second  
142 age class also showed a clear transient phase, lasting at least 5 years (Fig. 4B). During this  
143 transient phase, pertussis incidence was first predominantly driven by infants from  
144 unvaccinated mothers (Fig. 4C), followed later on by incidence in infants from vaccinated  
145 mothers, who dominated once incidence had reached equilibrium (Fig. 4D). These  
146 dynamics persisted in children up to 5 years of age, but dissipated by age 10 years, after  
147 which pertussis incidence remained low and the effects of both maternal immunization  
148 and blunting on pertussis incidence were negligible (Fig. S3).

149  
150 *Comparison with empirical estimates suggests that blunting cannot be ruled out*

151  
152 Lastly, we estimated the impact of blunting on the RR of pertussis in vaccinated infants  
153 born to mothers vaccinated during pregnancy. In newborns, our simulations show that  
154 estimates of the effectiveness of maternal immunization (*i.e.*, based on incidence) have a  
155 transient phase in a direction consistent with those deduced from the transient incidence  
156 dynamics: the effectiveness of maternal immunization was high at first but decreased  
157 with time, and equilibrium values were reached only after a transient phase that lasted  
158 at least a decade (Fig. 5A). Hence, ignoring the transient dynamics results in an  
159 overestimation of the effectiveness of maternal immunization, an effect most pronounced  
160 during the first decade after implementation.

161

162 As expected, in the second age class of infants aged 3–18 months, (*i.e.*, after receipt of the  
163 primary pertussis immunization), blunting resulted in RR equilibrium values above 1 (*i.e.*,  
164 a higher risk of pertussis in infants born to vaccinated mothers relative to unvaccinated  
165 mothers), which increased with the input blunting strength. However, these risks were  
166 reached only after a transient phase that lasted more than a decade (Fig. 5B). During this  
167 transient phase, even in scenarios with blunting, the RR was initially far below 1 and  
168 gradually increased after the start of maternal immunization. Hence, ignoring these  
169 transient dynamics and assuming that an RR of 1 indicates no blunting may result in  
170 overestimating the effectiveness of maternal immunization in both unvaccinated  
171 newborns and vaccinated infants (Fig. 5B). It is noteworthy that the transient phase for  
172 the estimation of RR (Fig. 5 A & B) is longer than for the incidence (Fig. 4 A & B). This is  
173 because RR (and hence VE) are cumulative estimates instead of instantaneous estimates  
174 such as incidence (Fig. S4). Interestingly, depending on the contact matrix, the incidence  
175 during the transient phase showed oscillating dynamics, which increases the variability  
176 between estimates after 3, 6, or even 10 years (Figs. S12, S13), but these oscillations  
177 disappeared in the RR estimates (Figs. S14, S15), likely thanks to their cumulative nature.  
178 Interestingly, after the transient phase, a scenario without blunting resulted in RRs below  
179 1, due to residual protection from maternal antibodies in infants who were vaccinated  
180 but in whom the vaccine did not take. This result suggests that the usual assumption that  
181 an RR of 1 indicates no blunting may be too optimistic.

182

183 Comparing our model predictions with the results of epidemiological studies, all current  
184 empirical RR estimates fell well within the transient phase of our simulations (Fig. 5C).  
185 Demographic stochasticity accounted for some of the variability in the predicted RR (Fig.  
186 5B), but observation noise due to small sample sizes was by far the largest source of  
187 uncertainty (Fig. 5C). Inspecting the overlap between confidence intervals, all the  
188 empirical estimates were consistent with blunting, even though two estimates (in the UK  
189 and California) were also consistent with no blunting. Hence, according to our  
190 simulations, current empirical studies cannot yet detect the eventual epidemiological  
191 consequences of blunting (Fig. 5B), because of the transient RR dynamics following the  
192 rollout of maternal immunization. Hence, the model-data comparison suggests that

193 current empirical RR estimates cannot rule out a modest level of blunting of infant  
194 primary immunization (Fig. 5C).

195

### 196 *Sensitivity analyses*

197

198 To assess the robustness of our results, we conducted a range of sensitivity analyses with  
199 different hypotheses regarding model parameters, such as the coverage of maternal and  
200 infant immunization, the average duration of maternal protection, age-specific contact  
201 patterns, the age of primary immunization, and the basic reproduction number). To  
202 assess the consequences of non-pharmaceutical interventions (NPIs) during the COVID-  
203 19 pandemic, we further simulated scenarios with transient reductions in vaccine  
204 coverage and pertussis transmission. In our simulations, variation in these parameters  
205 sometimes had a substantial impact on pertussis incidence, e.g., Figs. S7, S9, S11, and S13.  
206 However, our conclusions about blunting were robust in all the sensitivity analyses, and  
207 the results presented in Figs. S5 to S34 were consistent with those presented in Fig. 4 and  
208 Fig. 5.

209

210 The sensitivity analyses revealed a few noteworthy results. First, a considerable  
211 reduction of the blunting effect on pertussis incidence was predicted when delaying the  
212 age at the start of the infant's primary immunization by a few months (Fig. S11, S12).  
213 Second, the empirical epidemiological studies with two or three years of monitoring  
214 could match scenarios with blunting reducing vaccine effectiveness by up to 50% (Fig.  
215 S22). However, such a high level of blunting could be ruled out by the 6-year study in the  
216 UK. This indicates the need for larger sample sizes and longer monitoring to reliably  
217 estimate vaccine effectiveness and the impact of new immunization programs. Third,  
218 consistent with expectation and epidemiological observations, the COVID-19 pandemic  
219 was predicted to have a substantial impact on pertussis dynamics, with a decline in  
220 incidence followed by a rebound (e.g., Figs. S25 A&B, S27A&B, S29A&B, S31A&B, S34 A-  
221 D). However, the temporal dynamics of RR remained consistent in this scenario (Figs.  
222 S32, S33, S34 E-H), likely because in our model control measures equally affected infants  
223 born from vaccinated or unvaccinated mothers.

224

## 225 **Discussion**



226

227 In this study, we aimed to review the epidemiological evidence regarding the impact of  
228 maternal immunization on the effectiveness of pertussis vaccines in infants. We interpret  
229 this evidence using a new mechanistic mathematical model that represented the effect of  
230 blunting on pertussis transmission dynamics. Our systematic review identified four  
231 observational epidemiological studies, which had a maximum monitoring time of 6 years  
232 and were often combined with small sample sizes. Most studies suggested a reduced risk  
233 of pertussis after receipt of the first vaccine dose in infants born to mothers immunized  
234 during pregnancy. After receipt of the second or third vaccine dose, however, the  
235 estimates had large uncertainty, consistent with a range of assumptions about blunting  
236 levels. To interpret these empirical estimates, we performed a simulation study using an  
237 age-structured model of pertussis transmission. This model predicted that the  
238 introduction of maternal immunization was followed by a transient phase lasting at least  
239 a decade, during which the blunting effect of maternal antibodies could be  
240 underestimated. The model-data comparison suggested that a modest level of blunting  
241 could not be ruled out, even though the large uncertainty in empirical estimates  
242 prevented a definitive conclusion. Even in the presence of such blunting, however, our  
243 model predicted that maternal immunization remained effective at reducing pertussis in  
244 unvaccinated newborns. Hence, our results confirm that maternal immunization is an  
245 effective strategy to protect this age group, but suggest it may eventually result in an  
246 infection-control trade-off with older age groups.

247

248 Unvaccinated newborns are the age group most vulnerable to pertussis, both in terms of  
249 infection and hospitalization risks<sup>6,7,8</sup>. Our study suggests that, although blunting may  
250 erode the benefits of immunization in infants, maternal immunization is highly effective  
251 at protecting unvaccinated newborns. Hence, our results support the decision of many  
252 public health authorities to introduce maternal immunization against pertussis, provided  
253 that the main control objective is to protect newborns<sup>9,10</sup>. More generally, given the  
254 vulnerability of newborns to many pathogens, maternal immunization against other  
255 infectious diseases is considered by public health authorities, and the pharmaceutical  
256 industry is developing new vaccines for immunization during pregnancy. For example, a  
257 maternal vaccine against RSV recently underwent successful phase 3 trial<sup>28</sup> and may soon  
258 be rolled out<sup>29</sup>. In addition to the Tdap and RSV vaccines, maternal immunization is

259 implemented or recommended for influenza, COVID-19, and several other infections<sup>30-32</sup>.  
260 Maternal immunization, therefore, also appears as a promising strategy to protect  
261 newborns against these infections, but given that immunological blunting has been  
262 documented for many infections<sup>18,33-36</sup>, our results suggest the need to monitor its  
263 impact on subsequent vaccination of infants carefully.

264

265 One of the main takeaways from our review was the large uncertainty around the  
266 available empirical estimates, emphasizing the urgent need for more research on  
267 blunting. However, if such blunting is confirmed by future evidence, there are ways to  
268 mitigate its impact. Immunity in newborns conferred by maternal antibodies against  
269 pertussis likely wanes quickly, on a timescale of months, according to our model. Given  
270 the fast waning of maternal antibodies and the association between the maternal  
271 antibody titers and the blunting of infant immune responses<sup>37</sup>, delaying infant primary  
272 immunization by a few months might greatly reduce the maternal blunting of infant  
273 immunization<sup>35</sup>. Pertussis immunization schedules vary greatly between countries, with  
274 the age at first immunization of infants typically ranging between two and four months<sup>38</sup>,  
275 and the current variation in pertussis immunization schedule can significantly impact the  
276 effectiveness of pertussis immunization in infants<sup>39</sup>. If maternal blunting occurs, our  
277 results suggest that the optimal age at first immunization is governed by a trade-off  
278 between vaccinating too early (with the effect of reducing the susceptibility age window  
279 in newborns but amplifying the impact of blunting in vaccinated infants) and too late  
280 (with the opposite effect). As the costs of infection in unvaccinated newborns likely  
281 exceed those in older age groups, the introduction of maternal immunization may thus  
282 increase the optimal age at first immunization, in all infants or only in those born to  
283 vaccinated mothers. The Dutch public health authorities take an interesting approach:  
284 the recommended age for the first dose of primary immunization for children from  
285 unvaccinated mothers is two months, while for children from vaccinated mothers the  
286 recommendation is to start one month later, at three months<sup>40</sup>. Identifying the optimal  
287 pertussis immunization schedule for infants would be helpful for public health  
288 authorities, especially given the vast between-country variation in pertussis  
289 immunization schedules<sup>38,39,41</sup>. Our new model could thus help future research on  
290 optimal vaccine schedules.

291

292 After the roll-out of maternal immunization, our model predicted a transient phase  
293 lasting approximately a decade, during which the incidence of pertussis—in both  
294 unvaccinated newborns and vaccinated infants—initially dropped, but then bounced  
295 back and increased to reach a new equilibrium. The duration of this transient phase is  
296 consistent with that found in a previous modeling study<sup>42</sup> and may be explained by the  
297 time required for the first cohorts of blunted-vaccinated infants (*i.e.*, born to vaccinated  
298 mothers) to reach primary school age and its associated high contacts. Thus, reduced  
299 transmission from unvaccinated newborns may explain the initial decrease in incidence  
300 across age groups, but this benefit gradually wears off as blunted-vaccinated, and  
301 therefore less well-protected, children age.

302

303 From a practical perspective, the transient phase following maternal immunization has  
304 at least two important implications. First, the current individual-based epidemiological  
305 studies had  $\leq 6$  years of monitoring, which we predict is insufficient to capture the  
306 consequences of maternal immunization that can only be detected with at least a decade  
307 of data. Second, an RR of 1 is considered the baseline value indicating that maternal  
308 immunization does not blunt vaccine effectiveness in infants. In the transient phase,  
309 however, our model predicts that the baseline value under a no-blunting scenario starts  
310 off close to 0 and gradually increases to an equilibrium just below 1. This equilibrium  
311 value results from the residual protection from maternal antibodies, which partially  
312 compensates for failures of primary immunization in infants born to vaccinated mothers.  
313 These results suggest that the early empirical estimates of vaccine effectiveness may  
314 overestimate the benefits of maternal immunization, both for newborns and for infants.  
315 A testable prediction of our model, therefore, is that the benefits of maternal  
316 immunization estimated in subsequent studies will be lower than those currently  
317 reported, both in newborns and after the primary series. More broadly, as reflected in  
318 some official guidelines for vaccine impact evaluation<sup>43</sup> and demonstrated for other  
319 vaccines such as influenza and streptococcus, biased estimation of vaccine effectiveness  
320 because of transient dynamics early after vaccine rollout is likely a more general  
321 occurrence.

322

323 Epidemiological monitoring studies have, until now, not reported maternal  
324 immunization-mediated rebounds in pertussis incidence (e.g.,<sup>44</sup>). However, we believe

325 that the best way to quantify the clinical and epidemiological impact of blunting is by  
326 more precise individual-level estimation of the RR (ideally after the transient phase  
327 predicted by our model), instead of monitoring population-level changes in pertussis  
328 incidence. This is for several reasons. First, we predict that the rebound a few years after  
329 the roll-out of maternal immunization will be small compared to the large reduction  
330 immediately after. Hence, detecting an increase in pertussis incidence resulting from  
331 maternal immunization may be difficult. Second, many countries have reported pertussis  
332 resurgence in the last decades<sup>5</sup>, so empirical studies of pertussis incidence may face the  
333 challenge of disentangling pre-maternal immunization increases from a post-maternal  
334 immunization rebound, which is challenging especially considering the multiannual  
335 periodicity of pertussis. The interpretation of trends in pertussis incidence may be  
336 further compounded by changes in national immunization schedules (e.g.,<sup>39</sup>) and the  
337 impact of NPIs during the COVID-19 pandemic. For the latter, we predict that the RR will  
338 remain a more robust metric.

339

340 In addition to the monitoring time, other components of the design of current  
341 epidemiological studies may affect their interpretation. First, as the mothers' decision to  
342 receive Tdap during pregnancy is voluntary and likely related to other socioeconomic  
343 factors that will affect—and presumably reduce—their infants' risk of pertussis, the  
344 baseline comparability between groups in these observational studies is far from  
345 obvious. Hence, estimates of the effectiveness of maternal immunization may have been  
346 confounded by healthy user bias; interestingly, the study that controlled most thoroughly  
347 for maternal characteristics<sup>16</sup> had large statistical uncertainty around its RR estimates  
348 and could not rule out blunting. In addition to this confounding problem, maternal  
349 immunization may prevent mothers from transmitting pertussis to their infants, an  
350 indirect effect that could lead to underestimating the risk of pertussis and masking the  
351 effect of blunting in the group of infants vaccinated and born to vaccinated mothers (as  
352 recognized by some investigators<sup>13</sup>). Because of these potential biases, current RR  
353 estimates may have been underestimated. Our model does not account for such potential  
354 biases and hence our model predictions regarding the level of blunting may be  
355 conservative.

356

357 Our study has several limitations. First, our model was parameterized based on previous  
358 estimates in Massachusetts, USA, and may only correctly represent pertussis  
359 epidemiology in comparable high-income countries. To address this limitation, we have  
360 performed sensitivity analyses with a range of basic reproduction numbers, and the  
361 conclusions were consistent. Second, in the absence of serological correlates of protection  
362 for pertussis<sup>45-47</sup>, the duration of maternally-derived protection—and in particular how  
363 it connects to maternal antibody titers in the infant—is unknown. In our model, this  
364 parameter was calibrated to reach empirical estimates of maternal immunization  
365 effectiveness in newborns, with an average duration of maternally derived protection at  
366 8.7 months resulting in vaccine effectiveness for newborns close to 80%. Even though  
367 sensitivity analyses demonstrated that our main results were robust to variations in this  
368 parameter, more accurate estimation will be important to inform future models and to  
369 predict optimal vaccination schedules. Third, for simplicity, we did not model the direct,  
370 protective effect of maternal immunization on mothers—only the indirect effect on their  
371 newborns. This direct effect is an additional benefit of maternal immunization, but  
372 because in high-income countries the proportion of women giving birth is small relative  
373 to the total adult population ([the 2010–2021 EU average ranging between 1.50 and 1.57](#)  
374 [live births per 1,000 individuals and the range among all EU-member states in 2021](#)  
375 [between 1.1 and 1.8 live births per 1,000 individuals<sup>48</sup>](#)), it is expected to have a minor  
376 epidemiological impact. Fourth, in our simulations, maternal immunization coverage was  
377 fixed at 70%, while in real-world settings it is often initially low and takes several years  
378 to increase to the higher values described in Table S1 (e.g., Fig. 1 in<sup>14</sup>). However, such  
379 temporal variations in immunization coverage are expected to increase the duration of  
380 the transient phase and would thus reinforce our conclusions about the unreliability of  
381 early empirical estimates.

382

383 To conclude, our study shows that maternal immunization is effective at protecting  
384 newborns, even when blunting erodes some of its benefits. The degree of blunting, and  
385 the extent to which it entails an epidemiological cost in older age groups, can not be  
386 known yet, as we predict that the implementation of maternal immunization is followed  
387 by a transient phase during which the epidemiological impact of blunting is masked.  
388 Hence, current epidemiological studies may be insufficient to rule out blunting or grasp  
389 the long-term epidemiological consequences of maternal immunization. Our results,

390 therefore, identify the need for more research to precisely estimate the degree of blunting  
391 after primary immunization, if any. More generally, our study supports the use of  
392 maternal immunization to reduce pertussis in newborns, but suggests this strategy may  
393 be associated with an infection-control trade-off between different age groups.

394

## 395 **Methods**

396

397 *Systematic review and meta-analysis of empirical studies on the relative risk of pertussis*  
398 *after maternal and infant primary immunization*

399

400 We searched the literature on Web of Science, PubMed, and Scopus on August 25, 2023.  
401 We used the search terms “maternal immunization AND pertussis AND effectiveness OR  
402 maternal vaccination AND pertussis AND effectiveness”. In Web of Science, we entered  
403 these terms under ‘Topic’, in PubMed we entered these terms under ‘Title/Abstract’, and  
404 in Scopus under ‘Article type, Abstract, Keywords’. In these three searches, we selected  
405 the publication dates from January 1, 2012, which is the first complete year with  
406 recommended maternal immunization in any country<sup>14</sup>, until August 25, 2023. To be  
407 included in our review, studies had to provide an estimate of the relative risk (RR) of  
408 pertussis in infants having received at least one dose of their primary immunization from  
409 vaccinated vs. unvaccinated mothers. We selected only those studies that used  
410 laboratory-confirmed diagnosis of pertussis. Because the RR of pertussis varies  
411 substantially between doses of infant primary immunization, we selected only studies  
412 that were explicit about the number of doses of primary immunization and we excluded  
413 those studies that pooled estimates for various doses. For studies that provided more  
414 than one estimate per dose, we used all estimates provided. When studies provided  
415 estimates with and without known pertussis onset dates, we chose those estimates with  
416 known onset dates.

417

418 To estimate the RR per dose of infant primary immunization, we performed the analyses  
419 in two ways, which gave consistent results. First, we estimated the weighted means of RR  
420 per dose. Second, we performed a meta-regression following<sup>49</sup> and as performed in<sup>50</sup>. In  
421 brief, in both analyses, we log-transformed the RR obtained from the studies and  
422 weighted the estimates according to the inverse of the 95% CI of the RR estimate. We



423 preferred to use RR rather than the numbers of cases<sup>51</sup> because there are two studies in  
424 which RR estimates correct for participants' socio-demographic covariates. The meta-  
425 regression allowed the inclusion of all doses (as a factor) into one model and to account  
426 for estimates coming from the same studies by having the study identity as a random  
427 intercept. To account for the fact that two studies were carried out in the same  
428 population, we repeated the meta-regression by including the population as a random  
429 intercept, which gave consistent results. We performed the meta-regression in R v. 4.2.0<sup>52</sup>  
430 with the function 'brm' from the package 'brms'<sup>53</sup> using flat uninformative priors with  
431 100,000 iterations, 20,000 burn-in, and a thinning of 40. Model residuals fulfilled all  
432 assumptions as checked with the function 'createDHARMA' of the package 'DHARMA'<sup>54</sup>.  
433 Meta-analyses usually control the heterogeneity between studies and most importantly  
434 for publication bias<sup>49</sup>, but given the low number of studies and sample sizes, this was not  
435 possible here.

436

#### 437 *Simulation: Model schematic*

438

439 We implemented an age-structured model of pertussis transmission, extending a  
440 previous model empirically validated on data from Massachusetts, USA<sup>4,27</sup>. In brief, the  
441 model is based on the Susceptible-Exposed-Infected-Recovery (SEIR, Fig. S1) model in  
442 which pertussis vaccines can fail by (i) failure in "take" (primary vaccine failure) and (ii)  
443 failure in duration (waning of vaccine protection)<sup>55</sup>. Based on immunological evidence  
444 showing an immediate reduction in the antibody response to primary vaccination<sup>21,22,35</sup>,  
445 we assumed that blunting from maternal immunization increased the probability of  
446 primary vaccine failure. Previous results in<sup>4</sup> found no evidence for failure in degree (or  
447 leakiness, i.e., when vaccine-induced protection is imperfect and vaccinees remain  
448 susceptible to infection, but at a lower degree than unvaccinated individuals), and hence  
449 we ignored this possibility.

450

451 The model is designed such that we follow individuals grouped according to their  
452 immunization history. For each immunization, individuals can go to either of three  
453 compartments: one for successful immunization, one for failed immunization, and one for  
454 immunization not received (Fig. S1). These three possible paths or compartments start  
455 from their mother's immunization status during pregnancy, followed by an infant

456 immunization schedule that resembles that of the empirical studies in Table S1: the  
457 infant's primary immunization occurs at the age of three months, and an infant booster  
458 at the age of 1.5 years. Hence, newborns can be born in three possible compartments:  
459 from vaccinated mothers whose immunization succeeded, mothers whose immunization  
460 failed (i.e., who received the vaccine but whose infant remained unprotected), or  
461 unvaccinated mothers. We model maternal immunization by transferring a fraction of  
462 newborns to a protected class. Maternal immunization in itself is not modeled; hence our  
463 model does not specify at which stage of pregnancy maternal immunization occurs. The  
464 assumed high effectiveness of maternal immunization implies that it occurred at a timing  
465 consistent with that used in the studies in Table S1 and in the empirical studies of the  
466 systematic review, i.e., during the second or third trimester of pregnancy and at least one  
467 week before giving birth.

468

469 Each of the three compartments is followed by a compartment for successful primary  
470 infant immunization (Fig. S1) and a compartment for failed primary infant immunization,  
471 thereby becoming susceptible (Fig. S1), or no immunization thereby also becoming  
472 susceptible. Following the first booster, these susceptibles become immunized again at  
473 an effectiveness of 96%, with a subsequent waning rate of vaccine protection of  $0.011 \text{ yr}^{-1}$   
474 (Table S3). For simplicity, as in earlier modeling studies<sup>4</sup>, we model the infant primary  
475 immunization as one event and we do not consider the gradual effect of multiple vaccine  
476 doses.

477

#### 478 *Model parametrization*

479

##### 480 Parametrization of the base model

481 Our model is based on<sup>4</sup>, which was fitted to pertussis incidence data from Massachusetts  
482 to identify the model parameters that best matched the data. Hence, for the parameters  
483 consistent between both models, we used the estimates from<sup>4</sup> (Table S3), but note that  
484 the sensitivity analyses explained below and shown in the supplementary information  
485 create conditions that represent other populations.

486

487 By adding maternal immunization to this model, we also added three new parameters.  
488 The first parameter is maternal immunization coverage, for which we use a baseline of



489 70%, consistent with the empirical estimates a few years after the rollout of maternal  
490 immunization (Table S1). The second parameter is the duration of maternally derived  
491 immunity, for which, there are no empirical estimates. One proxy is the half-life of  
492 maternal antibodies, which ranges between 29 and 36 days<sup>56,57</sup>, suggesting that the  
493 duration of maternally-derived immunity is short. However, because of the absence of  
494 definite correlates of protection<sup>45-47</sup>, the correspondence between the waning rate of  
495 maternal antibodies and that of maternal immunity is unknown. For example, if both  
496 waning rates are assumed equal and without the transfer of new maternal antibodies,  
497 e.g., through breastfeeding, according to our model the effectiveness of maternal  
498 immunization in the first two months after birth would be close to 50% (Fig. S1). This is  
499 in contrast with the estimated effectiveness of maternal immunization in that age class,  
500 which ranged from 78% (<sup>15</sup> 95% CI: 48–90) to 93% (<sup>12</sup> 95% CI: 81–97). Thus, in our  
501 model, we calibrated the average duration of maternal protection to reach these  
502 empirical estimates of vaccine effectiveness and hence we show results with an average  
503 duration of 8.7 months (Table S3, Fig. S2). The third parameter is the blunting of infant  
504 immune protection, defined as the relative reduction in the effectiveness of the primary  
505 series in infants born to vaccinated mothers (compared to infants born to unvaccinated  
506 mothers). There are no empirical estimates of the degree of blunting of infant protection  
507 following maternal immunization or how changes in IgG titers translate into changes in  
508 protection. When infants receive their primary immunization, the antibody  
509 concentrations of infants from vaccinated mothers are 30% to 60% lower compared to  
510 those from unvaccinated mothers<sup>21,22</sup>. To best match the empirical estimates of the  
511 relative risk of pertussis, we chose a decrease in the effectiveness of primary  
512 immunization from 0% (i.e., no blunting) to 20%. Formally, the blunting parameter  $b_1$  is  
513 modeled as a relative reduction in the initial effectiveness of infant immunization  $\Sigma$ ,  
514 resulting in a blunted effectiveness  $\underline{\varepsilon} = \varepsilon(1 - b_1)$ .

515

## 516 Sensitivity analyses

517 We checked the sensitivity of our results to nine model changes:

- 518 (i) maternal immunization coverage, changed from a baseline value of 70% to  
519 50% and to 90% (Fig. S5, S6), which is the range represented in Table S1;
- 520 (ii) infant immunization coverage, changed from a baseline value of 90% to 70%  
521 and 80% (Fig. S7, S8);

- 522 (iii) the average duration of maternal protection changed from a baseline value of  
523 8.7 months to 4 months and 1 year (Fig. S9, S10);
- 524 (iv) the start of primary immunization, changed from a baseline value of 3 months  
525 to 2, 4, and 9 months (Fig. S11, S12);
- 526 (v) different social contact matrices, with that of the UK as baseline (in Figs. 4 and  
527 5) and changed to those in 7 other European countries as described in<sup>58,59</sup> (Fig.  
528 S13-S18). A more detailed age-specific contact matrix is available for the UK<sup>60</sup>,  
529 but not for other countries and hence we used an age-structure that is  
530 consistent across countries;
- 531 (vi) starting the maternal immunization program 60 years after the rollout of  
532 primary immunization, instead of 100 years. This reflects an introduction of  
533 maternal immunization during a honeymoon-mediated pertussis resurgence,  
534 as was the case in many countries (Fig. S19, S20);
- 535 (vii) blunting the effectiveness of the infant primary immunization up to 60% (Fig.  
536 S21, S22), instead of the baseline range of 0% to 20%;
- 537 (viii)  $\pm 50\%$  variations in the basic reproduction number, to model different  
538 transmission levels in a range of populations (Fig. S23, S24);
- 539 (ix) the impact of the COVID-19 pandemic, modeled as 3- to 9-month period  
540 associated with lower vaccine coverage (20% reduction) and lower  
541 transmission (20%, 50%, or 70% reduction, as a result of social distancing  
542 measures, Fig. S25-S34). This sensitivity analysis is motivated by the  
543 observation that COVID-19-associated social distancing measures  
544 substantially decreased pertussis incidence<sup>61,62</sup>. To model NPIs during the  
545 COVID-19 pandemic, we followed the approach from a previous study which  
546 reduced the transmission between 20% and 70% for a duration of 3 months  
547 and 9 months<sup>63</sup>. We obtained estimates of the changes in immunization  
548 coverage during the COVID-19 pandemic from three empirical studies<sup>64-66</sup>. In  
549 our model, we introduced these changes 8 years after the rollout of the  
550 maternal immunization program because that matches the 8-year lag between  
551 the first maternal immunization programs and the COVID-19 NPIs in most  
552 countries.

553

554 *Estimation of relative risk of infection following maternal immunization*

555

556 To connect the model outputs with the empirical estimates of relative risk (RR)<sup>13,14,16,17</sup>,  
557 we calculated the risk of contracting pertussis in infants born to vaccinated mothers  
558 relative to that of infants born to unvaccinated mothers using the same approach as  
559 in<sup>13,17</sup>. These studies used the screening method following<sup>67</sup>, in which the RR is estimated  
560 as:

$$561 \quad RR = \frac{PCV}{(1 - PCV)} \cdot \frac{(1 - PPV)}{PPV}$$

562 where PCV (proportion of cases vaccinated) is the proportion of cases in vaccinated  
563 infants born to vaccinated mothers among all cases in infants vaccinated, and PPV is the  
564 proportion of the population vaccinated, here equal to the vaccine coverage of maternal  
565 immunization. We validated the RR estimates of the simulations by setting the half-life of  
566 maternally derived protection to infinity, which resulted in a RR of 0.05 in newborns and  
567 matched the initial 95% effectiveness of maternal immunization against pertussis in  
568 unvaccinated newborns fixed in the simulations (Fig. S2, Table S3). Hence, while the  
569 screening method may have several limitations in real-world settings<sup>68</sup>, it provided  
570 reliable estimates of vaccine effectiveness in the context of our model.

571

### 572 *Numerical implementation*

573

574 We represented the process model as a continuous-time Markov process, approximated  
575 via the tau-leap algorithm<sup>69</sup> with a fixed time step of 1 day. To compare the model outputs  
576 to empirical estimates, we also added an observation model for the RR. This was done by  
577 sampling the number of vaccinated cases born to vaccinated mothers from a Binomial  
578 distribution with probability PCV and size equal to the number of cases described in the  
579 empirical studies at the third dose (Table S1). The model was implemented and simulated  
580 using the ‘pomp’ package v. 4.4.3.0<sup>70</sup>, operating in R v. 4.2.0<sup>52</sup>.

581

## 582 **References**

- 583 1. Kilgore, P. E., Salim, A. M., Zervos, M. J. & Schmitt, H. J. Pertussis: Microbiology, Disease,  
584 Treatment, and Prevention. *Clin. Microbiol. Rev.* **29**, 449–486 (2016).
- 585 2. Rohani, P. & Scarpino, S. V. *Pertussis: Epidemiology, Immunology & Evolution*. (Oxford

- 586 University Press, Oxford, 2019).
- 587 3. Amirthalingam, G., Gupta, S. & Campbell, H. Pertussis immunisation and control in England  
588 and Wales, 1957 to 2012: a historical review. *Euro Surveill.* **18**, ii=20587 (2013).
- 589 4. Domenech de Cellès, M., Magpantay, F. M. G., King, A. A. & Rohani, P. The impact of past  
590 vaccination coverage and immunity on pertussis resurgence. *Sci. Transl. Med.* **10**, eaaj1748  
591 (2018).
- 592 5. Domenech de Cellès, M., Magpantay, F. M. G., King, A. A. & Rohani, P. The pertussis enigma:  
593 reconciling epidemiology, immunology and evolution. *Proc. Biol. Sci. B* **283**, 20152309  
594 (2016).
- 595 6. Kandeil, W. *et al.* A systematic review of the burden of pertussis disease in infants and the  
596 effectiveness of maternal immunization against pertussis. *Expert Rev. Vaccines* **19**, 621–638  
597 (2020).
- 598 7. Mbayei, S. A. *et al.* Severe Pertussis Infections in the United States, 2011–2015. *Clin. Infect.*  
599 *Dis.* **69**, 218–226 (2019).
- 600 8. Quinn, H. E. *et al.* Pertussis disease and antenatal vaccine effectiveness in Australian  
601 children. *Pediatr. Infect. Dis. J.* **41**, 180–185 (2022).
- 602 9. World Health Organization. Pertussis vaccines: WHO position paper – August 2015. (2015).
- 603 10. Abu-Raya, B. *et al.* Global perspectives on immunization during pregnancy and priorities for  
604 future research and development: an international consensus statement. *Front. Immunol.*  
605 **11**, 1282 (2020).
- 606 11. Amirthalingam, G. *et al.* Effectiveness of maternal pertussis vaccination in England: an  
607 observational study. *Lancet* **384**, 1521–1528 (2014).
- 608 12. Dabrera, G. *et al.* A case-control study to estimate the effectiveness of maternal pertussis  
609 vaccination in protecting newborn infants in England and Wales, 2012–2013. *Clin. Infect.*  
610 *Dis.* **60**, 333–337 (2015).
- 611 13. Amirthalingam, G. *et al.* Sustained effectiveness of the maternal pertussis immunization  
612 program in England 3 years following introduction. *Clin. Infect. Dis.* **63**, S236–S243 (2016).

- 613 14. Baxter, R., Bartlett, J., Fireman, B., Lewis, E. & Klein, N. P. Effectiveness of vaccination during  
614 pregnancy to prevent infant pertussis. *Pediatrics* **139**, e20164091 (2017).
- 615 15. Skoff, T. H. *et al.* Impact of the US Maternal Tetanus, Diphtheria, and Acellular Pertussis  
616 Vaccination Program on Preventing Pertussis in Infants <2 Months of Age: A Case-Control  
617 Evaluation. *Clin. Infect. Dis.* **65**, 1977–1983 (2017).
- 618 16. Rowe, S. L. *et al.* Maternal vaccination and infant influenza and pertussis. *Pediatrics* **148**,  
619 e2021051076 (2021).
- 620 17. Amirthalingam, G. *et al.* Optimization of Timing of Maternal Pertussis Immunization From 6  
621 Years of Postimplementation Surveillance Data in England. *Clin. Infect. Dis.* **8**, e1129–e1139  
622 (2023).
- 623 18. Albrecht, P., Ennis F. A., Saltzman, E. J. & Krugman, S. Persistence of maternal antibody in  
624 infants beyond 12 months: mechanism of measles vaccine failure. *J. Pediatr.* **91**, 715–717  
625 (1977).
- 626 19. Bento, A. I., King, A. A. & Rohani, P. Maternal pertussis immunisation: clinical gains and  
627 epidemiological legacy. *Euro Surveill.* **22**, 30510 (2017).
- 628 20. Leuridan, E. Pertussis vaccination in pregnancy: State of the art. *Vaccine* **35**, 4453–4456  
629 (2017).
- 630 21. Barug, D. *et al.* Maternal pertussis vaccination and its effects on the immune response of  
631 infants aged up to 12 months in the Netherlands: an open-label, parallel, randomised  
632 controlled trial. *Lancet Infect. Dis.* **19**, 392–401 (2019).
- 633 22. Abu-Raya, B. *et al.* The effect of Tetanus-Diphtheria-Acellular-Pertussis immunization  
634 during pregnancy on infant antibody responses: individual-participant data meta-analysis.  
635 *Front. Immunol.* **12**, 689394 (2021).
- 636 23. Jones, C. E. *et al.* A phase IV, multi-centre, randomized clinical trial comparing two  
637 pertussis-containing vaccines in pregnant women in England and vaccine responses in  
638 their infants. *BMC Med.* **19**, 138 (2021).
- 639 24. Sapuan, S. *et al.* An observational, cohort, multi-centre, open label phase IV extension study

- 640 comparing preschool DTAP-IPV booster vaccine responses in children whose mothers were  
641 randomised to one of two pertussis-containing vaccines or received no pertussis-  
642 containing vaccine in pregnancy in England. *Vaccine* **40**, 7050–7056 (2022).
- 643 25. Caboré, R. N. *et al.* Influence of maternal vaccination against diphtheria, tetanus, and  
644 pertussis on the avidity of infant antibody responses to a pertussis containing vaccine in  
645 Belgium. *Virulence* **8**, 1245–1254 (2017).
- 646 26. Zimmermann, P. *et al.* The effect of maternal immunisation during pregnancy on infant  
647 vaccine responses. *EclinicalMedicine* **13**, 21–30 (2019).
- 648 27. Domenech de Cellès, M., Rohani, P. & King, A. A. Duration of Immunity and Effectiveness of  
649 Diphtheria-Tetanus-Acellular Pertussis Vaccines in Children. *JAMA Pediatr.* **173**, 588–594  
650 (2019).
- 651 28. Kampmann, B. *et al.* Bivalent Prefusion F Vaccine in Pregnancy to Prevent RSV Illness in  
652 Infants. *N. Engl. J. Med.* **388**, 1451–1464 (2023).
- 653 29. Venkatesan, P. First RSV vaccine approvals. *Lancet Microbe* **4**, e577 (2023).
- 654 30. Omer, S. B. Maternal Immunization. *N. Engl. J. Med.* **376**, 1256–1267 (2017).
- 655 31. Halasa, N. B. *et al.* Effectiveness of Maternal Vaccination with mRNA COVID-19 Vaccine  
656 During Pregnancy Against COVID-19-Associated Hospitalization in Infants Aged <6 Months  
657 - 17 States, July 2021-January 2022. *MMWR Morb. Mortal. Wkly. Rep.* **71**, 264–270 (2022).
- 658 32. Etti, M. *et al.* Maternal vaccination: a review of current evidence and recommendations. *Am.*  
659 *J. Obstet. Gynecol.* **226**, 459–474 (2022).
- 660 33. Gans, H. A. *et al.* Deficiency of the Humoral Immune Response to Measles Vaccine in Infants  
661 Immunized at Age 6 Months. *JAMA* **280**, 527–532 (1998).
- 662 34. Mawa, P. A. *et al.* The impact of maternal infection with Mycobacterium tuberculosis on the  
663 infant response to bacille Calmette–Guérin immunization. *Philos. Trans. R. Soc. Lond. B Biol.*  
664 *Sci.* **3017**, 20140137 (2015).
- 665 35. Voysey, M. *et al.* The influence of maternally derived antibody and infant age at vaccination  
666 on infant vaccine responses: an individual participant meta-analysis. *JAMA Pediatr.* **17**,

- 667 637–646 (2017).
- 668 36. Grassly, N. C. *et al.* Effect of maternal immunisation with multivalent vaccines containing  
669 inactivated poliovirus vaccine (IPV) on infant IPV immune response: A phase 4, multi-  
670 centre randomised trial. *Vaccine* **41**, 1299–1302 (2023).
- 671 37. Abu-Raya, B. *et al.* Factors affecting antibody responses to immunizations in infants born to  
672 women immunized against pertussis in pregnancy and unimmunized women: Individual-  
673 Participant Data Meta-analysis. *Vaccine* **39**, 6545–6552 (2021).
- 674 38. Perkins, T. A. & Tran, Q. M. Timing is everything when it comes to pertussis vaccination.  
675 *Lancet Infect. Dis.* **22**, 158–159 (2022).
- 676 39. Paireau, J. *et al.* Impact of vaccine schedule change on pertussis epidemiology in France: a  
677 modelling and serological study. *Lancet Infect. Dis.* **22**, 265–273 (2022).
- 678 40. Rijksinstituut\_Voor\_Volksgezondheid\_en\_Milieu. Rijksinstituut voor Volksgezondheid en  
679 Milieu. *Dutch National Immunisation Programme*  
680 <https://rijksvaccinatieprogramma.nl/english> (2021).
- 681 41. Riolo, M. A. & Rohani, P. Combating pertussis resurgence: One booster vaccination schedule  
682 does not fit all. *Proc. Natl. Acad. Sci. U. S. A.* **112**, E472–E477 (2015).
- 683 42. Bento, A. I. & Rohani, P. Forecasting Epidemiological Consequences of Maternal  
684 Immunization. *Clin. Infect. Dis.* **63**, S205–S212 (2016).
- 685 43. World Health Organization. *Measuring impact of streptococcus pneumoniae and*  
686 *haemophilus influenzae type b conjugate vaccination.* (2012).
- 687 44. Skoff, T. H., Deng, L., Bozio, C. H. & Hariri, S. US Infant Pertussis Incidence Trends Before and  
688 After Implementation of the Maternal Tetanus, Diphtheria, and Pertussis Vaccine. *JAMA*  
689 *Pediatr.* In press (2023).
- 690 45. Van Rie, A., Wendelboe, A. M. & Englund, J. A. Role of maternal pertussis antibodies in  
691 infants. *Pediatr. Infect. Dis. J.* **24**, S62–S65 (2005).
- 692 46. Diavatopoulos, D. A. *et al.* PERISCOPE: road towards effective control of pertussis. *Lancet*  
693 *Infect. Dis.* **19**, e179–e186 (2019).



- 694 47. Chen, Z. *et al.* Evaluation of serum anti-pertussis toxin IgA antibodies for the diagnosis of  
695 Bordetella pertussis infection in young children. *J. Infect. Public Health* **16**, 1167–1173  
696 (2023).
- 697 48. Eurostat. How many children were born in the EU in 2021?  
698 <https://ec.europa.eu/eurostat/en/web/products-eurostat-news/w/ddn-20230309-1>  
699 (2023).
- 700 49. Nakagawa, S. & Santos, E. S. A. Methodological issues and advances in biological meta-  
701 analysis. *Evol. Ecol.* **26**, 1253–1274 (2012).
- 702 50. Kärkkäinen, T., Briga, M., Laaksonen, T. & Stier, A. Within-individual repeatability in  
703 telomere length: A meta-analysis in nonmammalian vertebrates. *Mol. Ecol.* **31**, 6339–6359  
704 (2022).
- 705 51. Viechtbauer, W. Conducting Meta-Analyses in R with the metafor Package. *J. Stat. Softw.* **36**,  
706 1–48 (2010).
- 707 52. R Core Team. *R: A Language and Environment for Statistical Computing*. [https://www.R-](https://www.R-project.org/)  
708 [project.org/](https://www.R-project.org/) (2022).
- 709 53. Bürkner, P.-C. brms: An R Package for Bayesian Multilevel Models Using Stan. *J. Stat. Softw.*  
710 **80**, 1–28 (2017).
- 711 54. Hartig, F. DHARMA: Residual Diagnostics for Hierarchical (Multi-Level / Mixed) Regression  
712 Models. R package version 0.4.6. <http://florianhartig.github.io/DHARMA/> (2022).
- 713 55. McLean, A. R. & Blower, S. M. Imperfect vaccines and herd immunity to HIV. *Proc. R Soc B*  
714 *Biol. Sci.* **253**, 9–13 (1993).
- 715 56. Healy, C. M. *et al.* Kinetics of maternal pertussis-specific antibodies in infants of mothers  
716 vaccinated with tetanus, diphtheria and acellular pertussis (Tdap) during pregnancy.  
717 *Vaccine* **38**, 5955–5961 (2020).
- 718 57. Oguti, B. *et al.* The half-life of maternal transplacental antibodies against diphtheria,  
719 tetanus, and pertussis in infants: an individual participant data meta-analysis. *Vaccine* **40**,  
720 450–458 (2022).



- 721 58. Mossong, J. *et al.* Social contacts and mixing patterns relevant to the spread of infectious  
722 diseases. *PLoS Med.* **5**, e74 (2008).
- 723 59. Béraud, G. *et al.* The French Connection: The First Large Population-Based Contact Survey  
724 in France Relevant for the Spread of Infectious Diseases. *PLoS One* **10**, e0133203 (2015).
- 725 60. van Hoek, A. J. *et al.* The Social Life of Infants in the Context of Infectious Disease  
726 Transmission; Social Contacts and Mixing Patterns of the Very Young. *PLoS ONE* **8**, e76180  
727 (2013).
- 728 61. Tessier, E. *et al.* Impact of the COVID-19 pandemic on Bordetella pertussis infections in  
729 England. *BMC Public Health* **22**, 405 (2022).
- 730 62. Reicherz, F., Golding, L., Lavoie, P. M. & Abu-Raya, B. Decay of anti-Bordetella pertussis  
731 antibodies in women of childbearing age following COVID-19 non-pharmaceutical  
732 measures. *Vaccine* **40**, 3746–3751 (2022).
- 733 63. Brett, T. S. & Rohani, P. Transmission dynamics reveal the impracticality of COVID-19 herd  
734 immunity strategies. *Proc. Natl. Acad. Sci. U. S. A.* **117**, 25897–25903 (2020).
- 735 64. Causey, K. *et al.* Estimating global and regional disruptions to routine childhood vaccine  
736 coverage during the COVID-19 pandemic in 2020: a modelling study. *Lancet* **398**, 522–534  
737 (2021).
- 738 65. Kim, S., Headley, T. Y. & Tozan, Y. Universal healthcare coverage and health service delivery  
739 before and during the COVID-19 pandemic: A difference-in-difference study of childhood  
740 immunization coverage from 195 countries. *PLoS Med.* **19**, e1004060 (2022).
- 741 66. Lai, X. *et al.* Estimating global and regional between-country inequality in routine childhood  
742 vaccine coverage in 195 countries and territories from 2019 to 2021: a longitudinal study.  
743 *EClinicalMedicine* **60**, 102042 (2023).
- 744 67. Farrington, C. P. Estimation of vaccine effectiveness using the screening method. *Int. J.*  
745 *Epidemiol.* **22**, 742–746 (1993).
- 746 68. Minodier, L. *et al.* Influenza vaccine effectiveness: best practice and current limitations of  
747 the screening method and their implications for the clinic. *Expert Rev. Vaccines* **13**, 1039–

- 748           1048 (2014).
- 749   69. He, D., Ionides, E. L. & King, A. A. Plug-and-play inference for disease dynamics: measles in  
750           large and small populations as a case study. *J. R. Soc. Interface* **7**, 271–283 (2010).
- 751   70. King, A. A., Nguyen, D. & Ionides, E. L. Statistical Inference for Partially Observed Markov  
752           Processes via the R Package pomp. *J. Stat. Softw.* **69**, 1–43 (2016).
- 753   71. Page, M. J. *et al.* The PRISMA 2020 statement: an updated guideline for reporting systematic  
754           reviews. *BMJ* **372**, n71 (2021).

755 **Acknowledgements**

756 We thank the useful discussions with and feedback from Andrew Tredennick (University  
757 of Georgia, USA), Christian Gunning (University of Georgia, USA), Denis Macina (Sanofi  
758 Pasteur, France), Laurent Coudeville (Sanofi Pasteur, France), and Edward Thommes  
759 (Sanofi Pasteur, Canada). We thank Laura Barrero Guevara for useful feedback on the  
760 figures.

761

762 **Data Reproducibility**

763 All R scripts are currently available at:

764 [https://drive.google.com/drive/folders/1-tT3XaPYwPbviXe1OB7\\_hvN8SSYe9HYJ](https://drive.google.com/drive/folders/1-tT3XaPYwPbviXe1OB7_hvN8SSYe9HYJ), and  
765 will be made freely available upon publication via Edmond, the Open Data Repository of  
766 the Max Planck Society.

767

768 **Potential conflict of interests**

769 Prof. Pejman Rohani received funding from Sanofi France for another separate project.

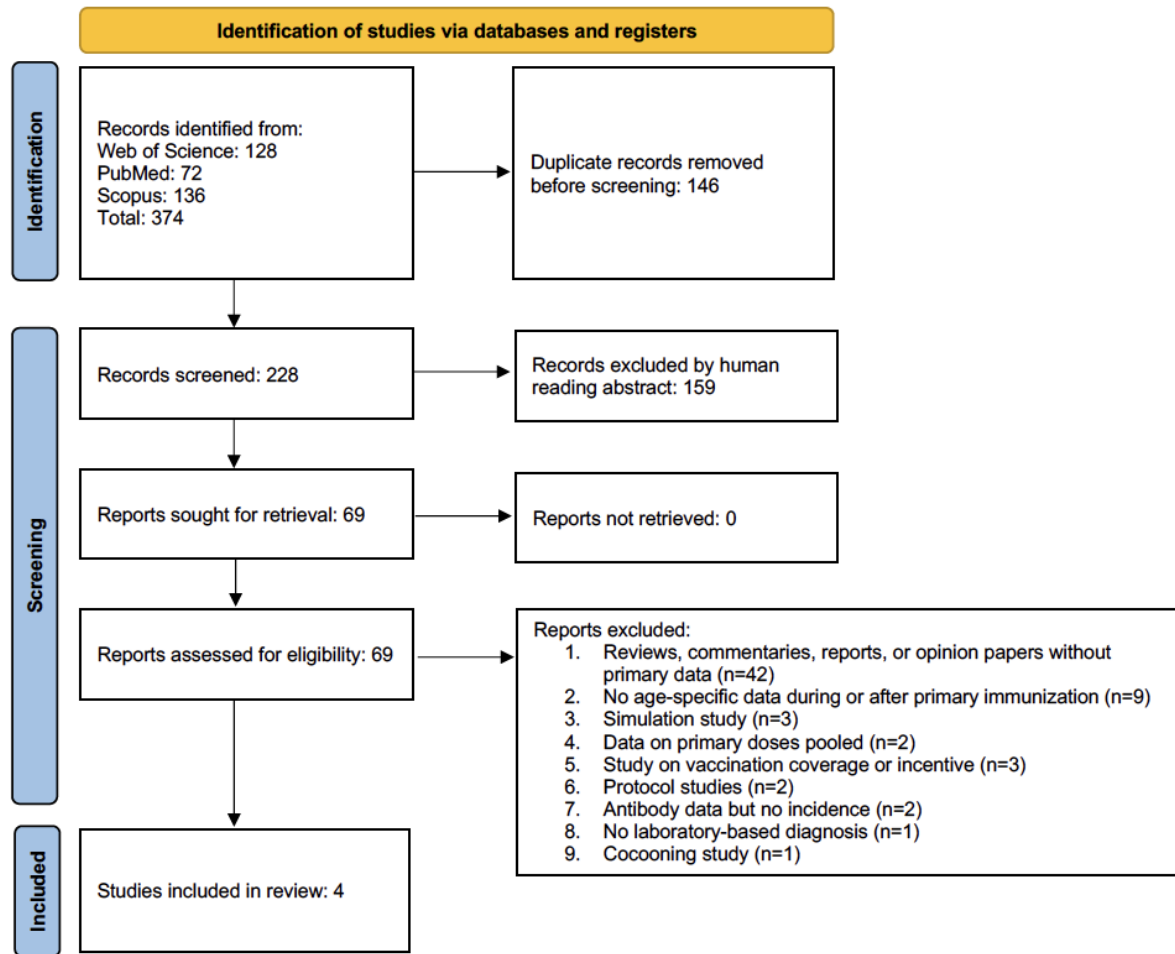

770

771 Fig. 1 Prisma flow chart, following<sup>71</sup>, of the literature search for empirical estimates of the  
 772 relative risk (RR) of contracting pertussis following maternal immunization in children  
 773 who had received at least one dose of infant primary immunization.

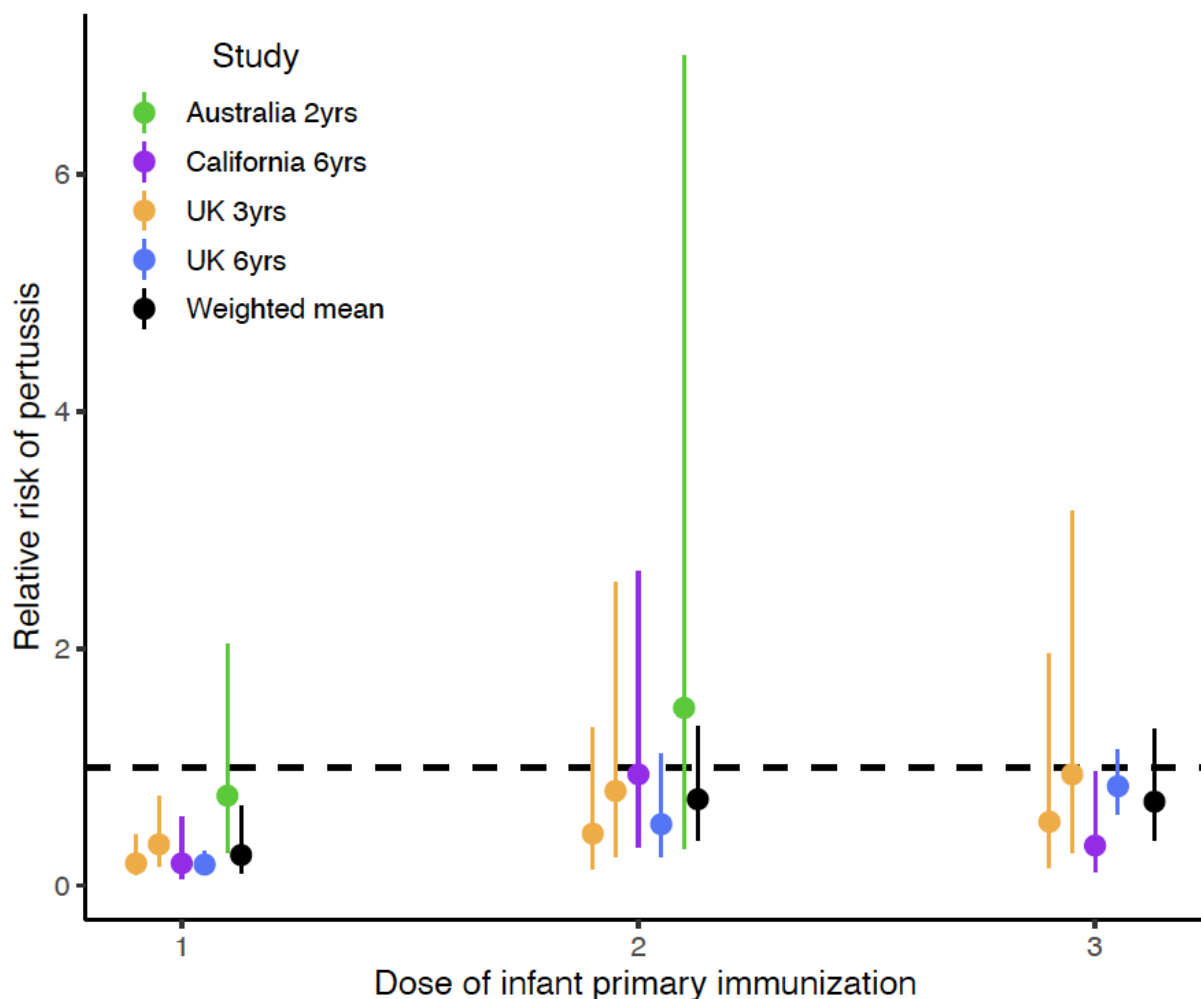

774

775 Fig. 2 Overview of the results from empirical epidemiologic studies of the relative risk of  
776 contracting pertussis after 1–3 vaccine doses for primary immunization in infants from  
777 vaccinated mothers relative to those of unvaccinated mothers during infant primary  
778 immunization. The literature search protocol is shown in Fig. 1, and the data are available  
779 in Table S1. The two lines for the UK 3-year study represent two estimates of maternal  
780 immunization coverage. References: Australia 2 yrs<sup>16</sup>, California 6 yrs<sup>14</sup>, UK 3 yrs<sup>13</sup>, and  
781 UK 6 yrs<sup>17</sup>.

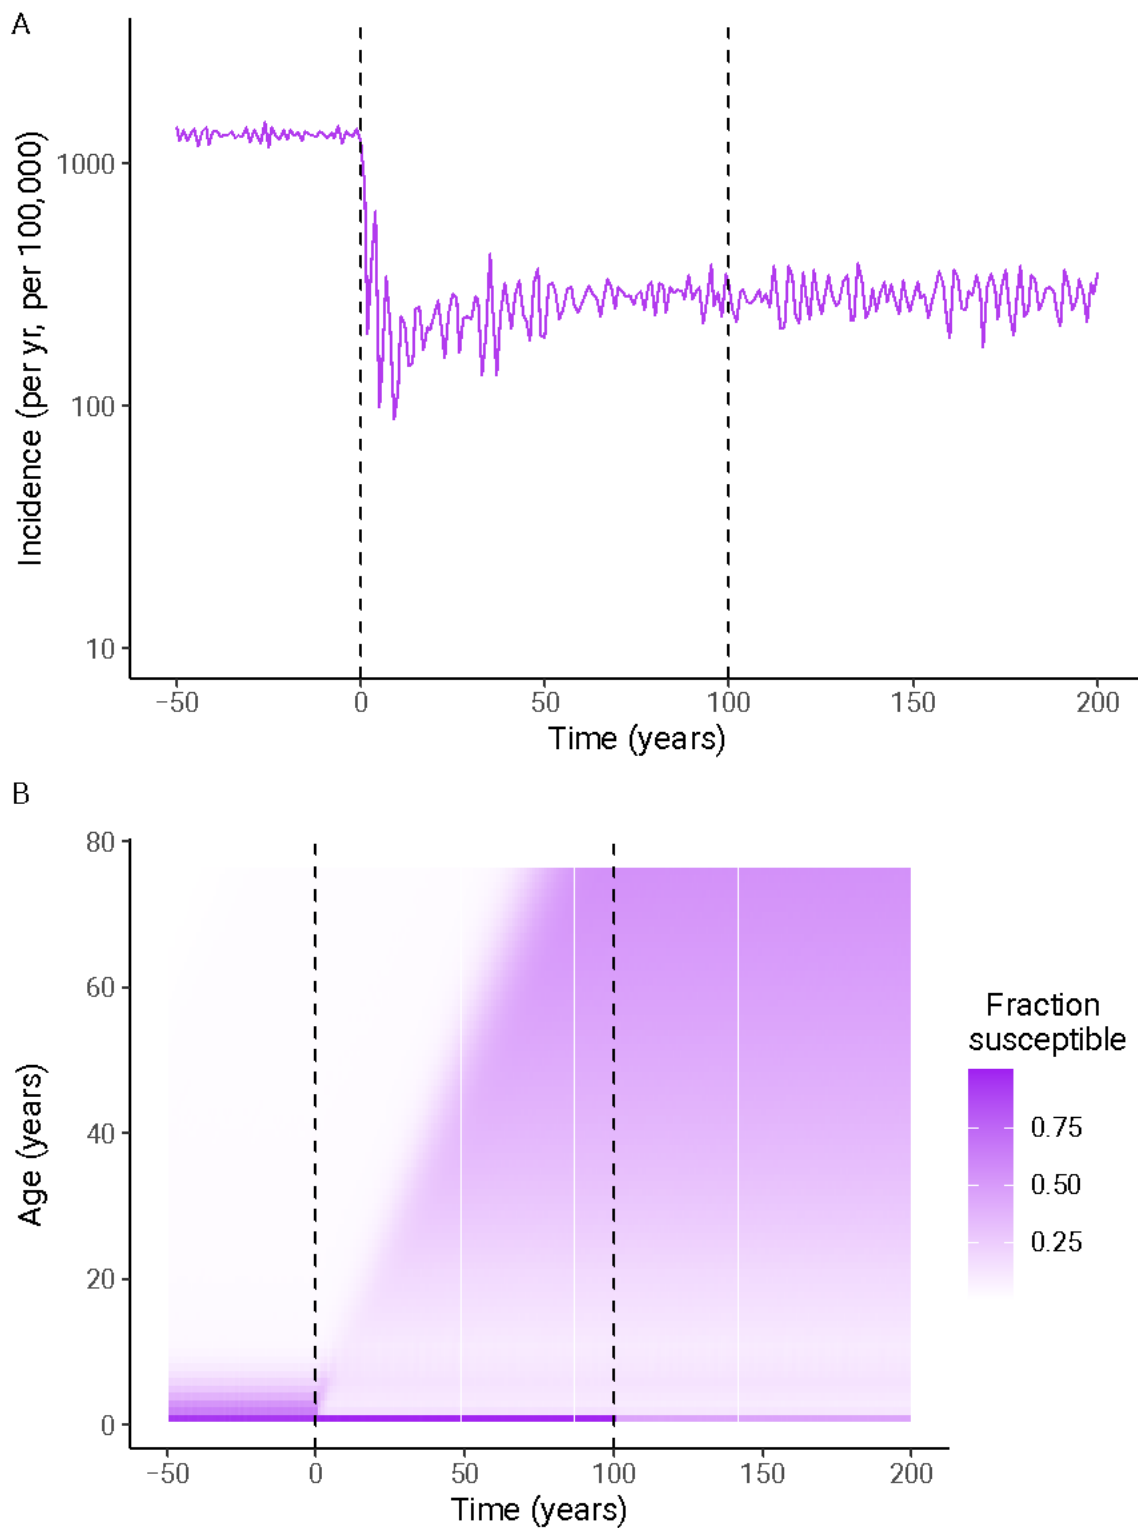

782

783 Fig. 3 Illustration of honeymoon effects and transient susceptible dynamics following the  
784 start of infant immunization (vertical dashed line at time = 0 years) and maternal  
785 immunization without blunting (vertical dashed line at time = 100 years) showing (A)  
786 pertussis incidence and (B) the fraction susceptible for each age class from one stochastic  
787 simulation.

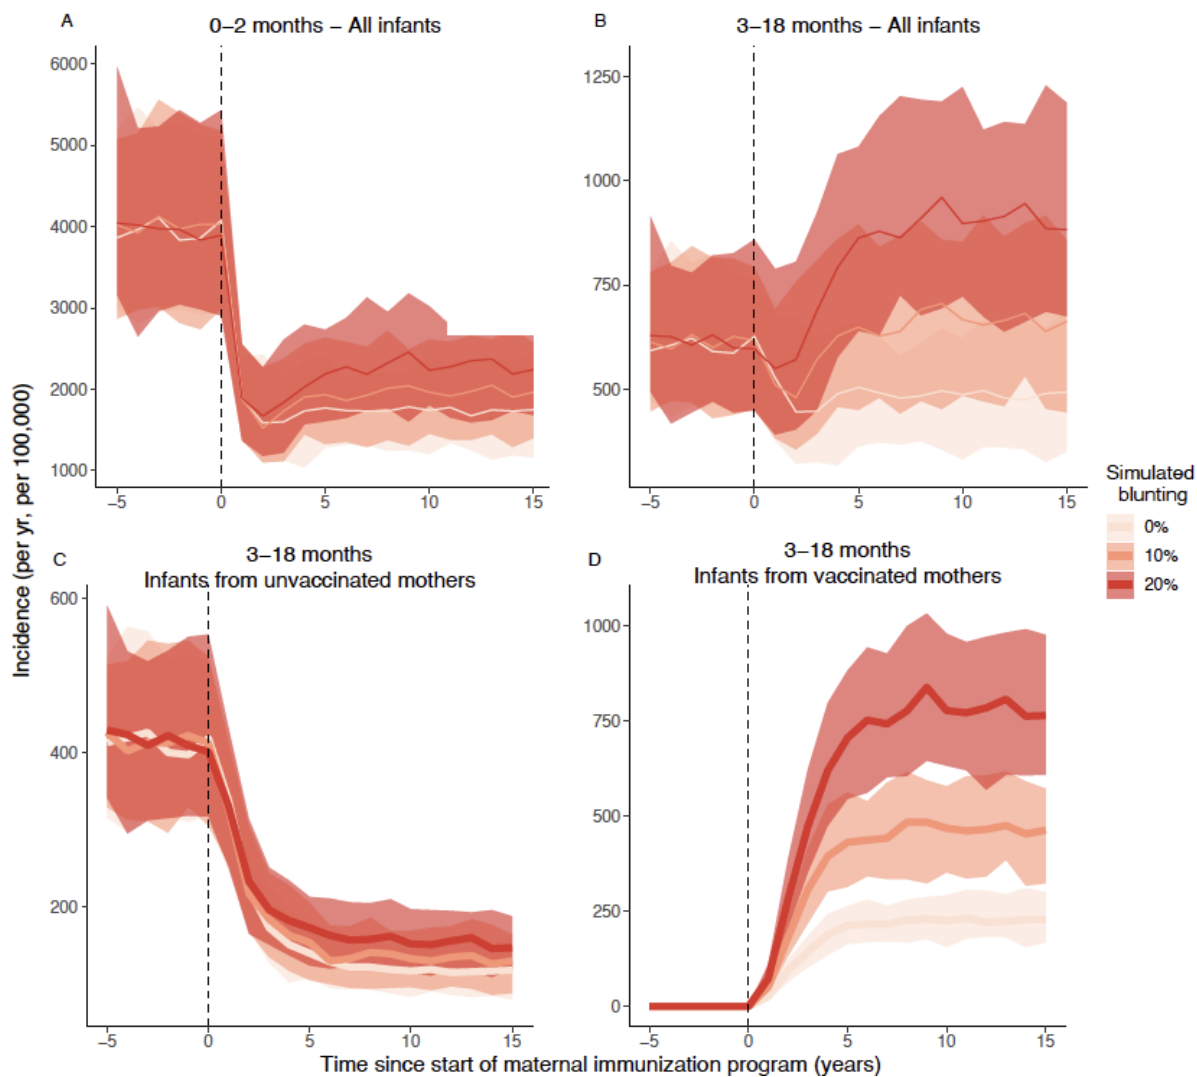

788

789 Fig. 4 Model predictions of the consequences of maternal immunization and blunting for  
790 pertussis incidence in (A) unvaccinated newborns (aged 0–2 mo) and (B) vaccinated  
791 infants (aged 3–18 mo, after receipt of primary immunization). For this age class, during  
792 the transient phase after maternal immunization, pertussis incidence is at first mostly  
793 driven by (C) infants from unvaccinated mothers until (D) pertussis incidence is most  
794 abundant in infants from vaccinated mothers. Panel (D) is consistent with the PCV-term  
795 in the RR equation (see methods, <sup>67</sup>). Solid lines show the median incidence of 100  
796 simulations and shaded areas represent the 95% CI. Pertussis incidence before the start  
797 of the maternal immunization program is shown as a control, and variation in incidence  
798 between simulations is the result of demographic stochasticity. In this figure, all  
799 immunization coverages were set at 70%, which is close to the mean observed values in  
800 empirical studies (e.g., Table S1). Note the different y-axis between panels.

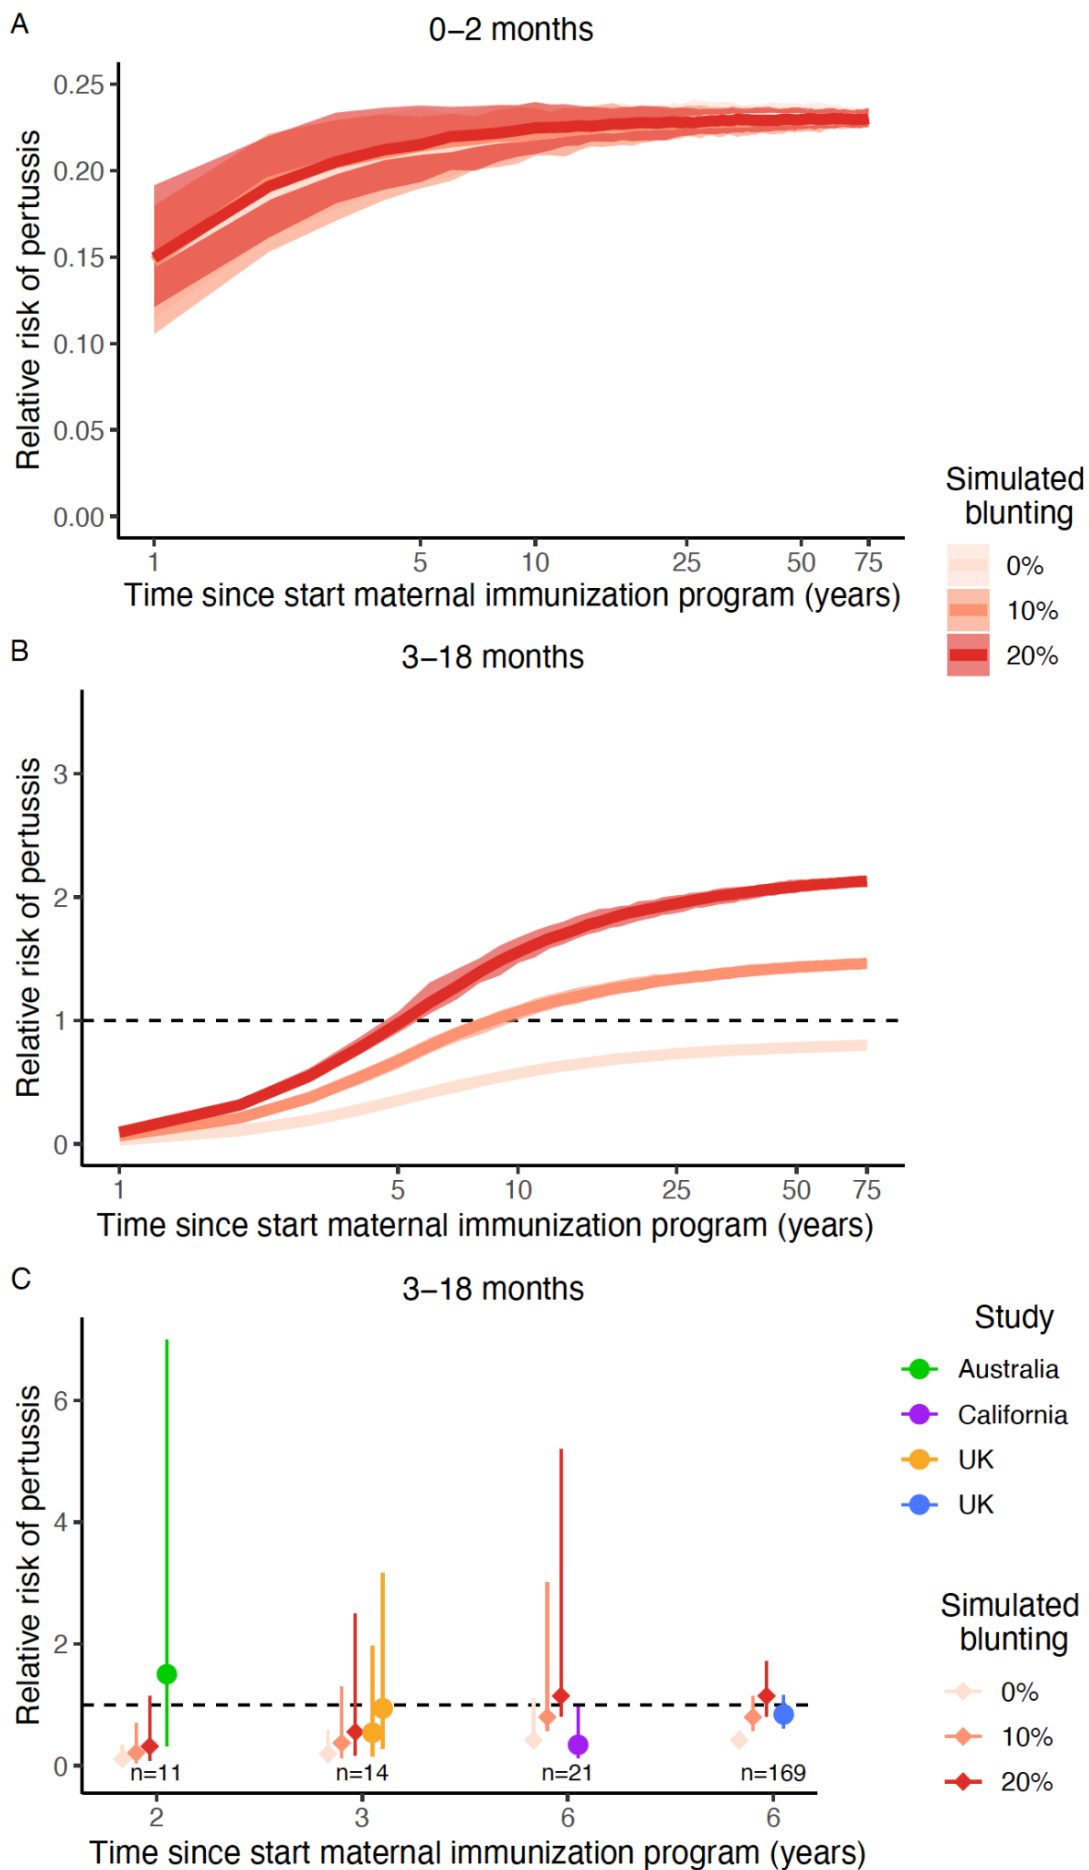



802 Fig. 5 Temporal dynamics of the risk of contracting pertussis in (A) unvaccinated  
803 newborns and (B, C) vaccinated infants from vaccinated mothers relative to those of  
804 unvaccinated mothers.. (A, B) Solid lines show the median RR of 100 simulations and  
805 shaded areas show 95% CI resulting from demographic stochasticity across simulations.  
806 (C) Comparison between the results from model simulations (gradient red diamonds)  
807 and the empirical studies (colored dots). In simulations, vertical lines show 95% CI due  
808 to demographic stochasticity and observation uncertainty, resulting from the partial  
809 sampling of the population with sample sizes matching those from empirical studies in  
810 Fig. 2 (Table S1).
